# Supplementary material for: Evolution process of humins derived from cellulose by a humin extraction approach
Source: Royal Society of Chemistry journal article supplement (doi:10.1039/d5gc00654f), 2025-01-01
Supplement: d5gc00654f1.pdf [file d5gc00654f1.pdf]

## Evolution process of humins derived from cellulose by approach of humins extraction

Xianda Li,<sup>[a]</sup> zhongping Shao,<sup>[a]</sup> Haozhe Shan,<sup>[b]</sup> and Li Liu<sup>\*[a]</sup>

<sup>a</sup> Inner Mongolia Key Laboratory of Synthesis and Application of Organic Functional Molecules, College of Chemistry and Chemical Engineering, Inner Mongolia University, Hohhot 010020, China.

<sup>b</sup> Dalian University of Technology, Dalian 116024, China.

Email: lliu@imu.edu.cn

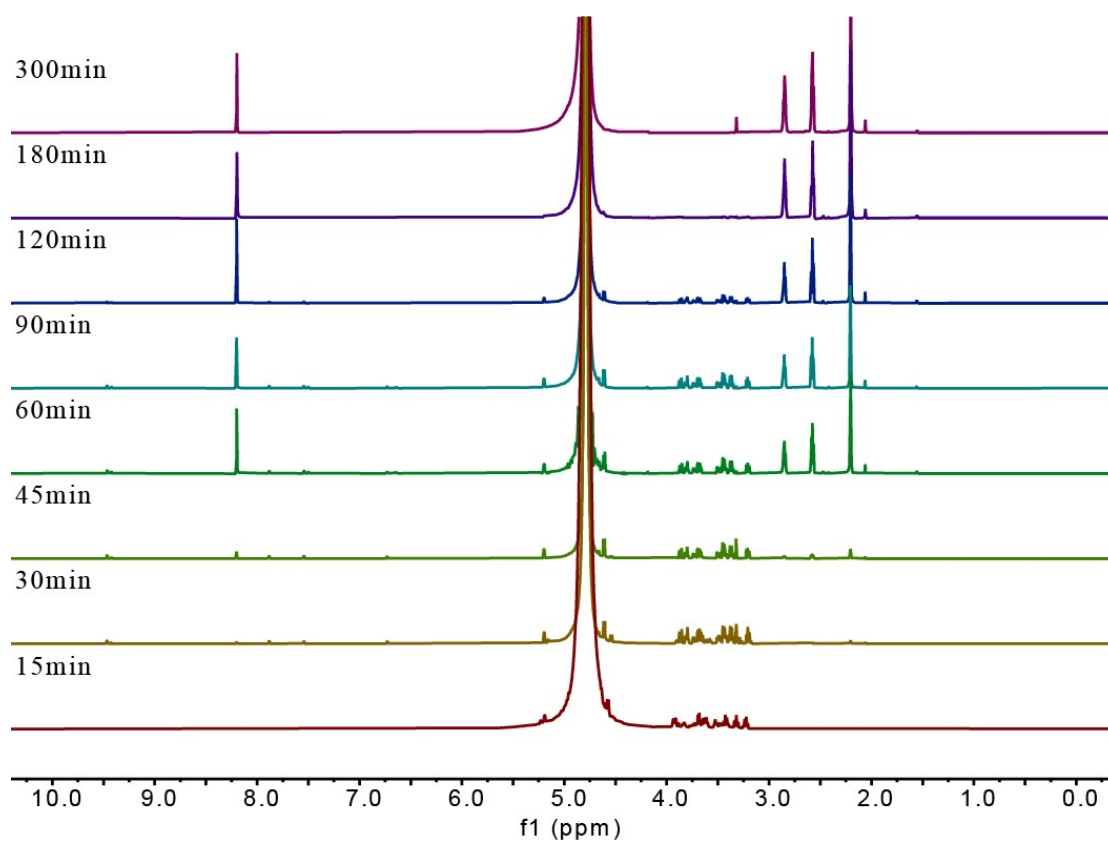

**Figure S1.** <sup>1</sup>H NMR spectra of the reaction mixture of cellulose at 170 °C.

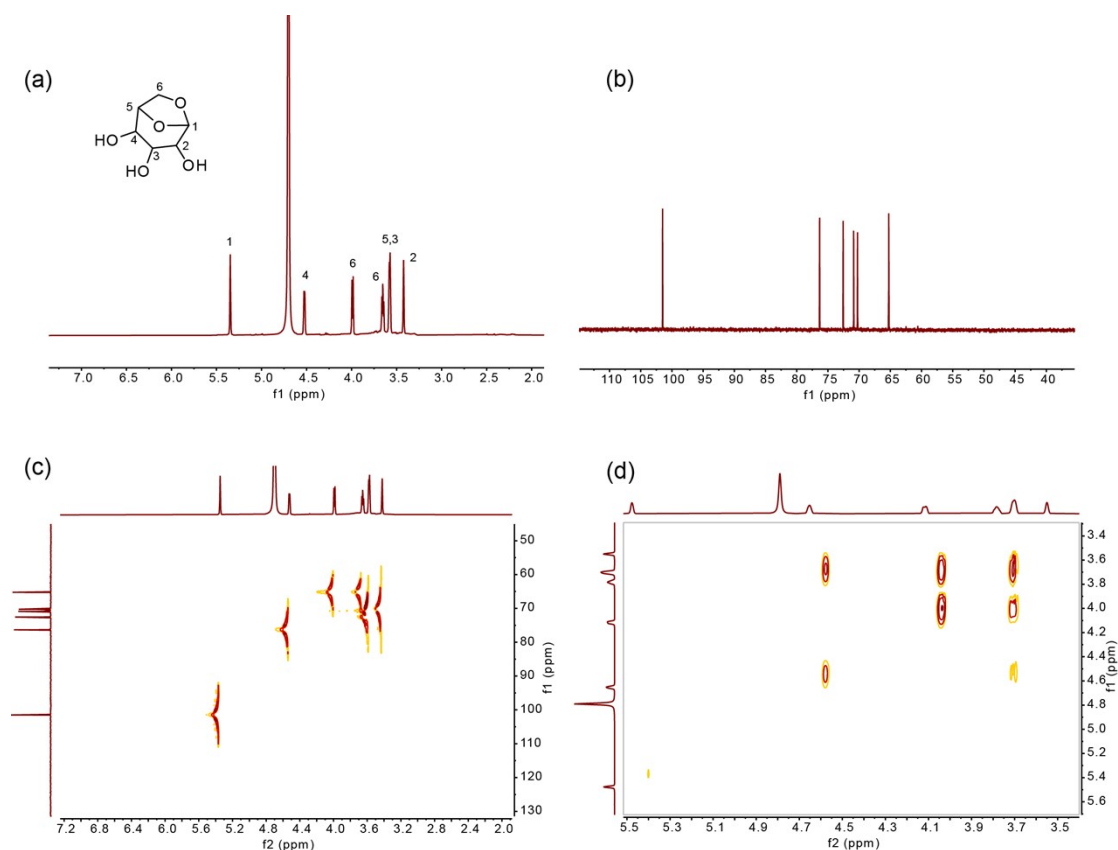

**Figure S2.** (a)  $^1\text{H}$  NMR, (b)  $^{13}\text{C}$  NMR, (c)  $^1\text{H}$ - $^{13}\text{C}$  HSQC, and (d)  $^1\text{H}$ - $^1\text{H}$  COSY spectra of levoglucosan.

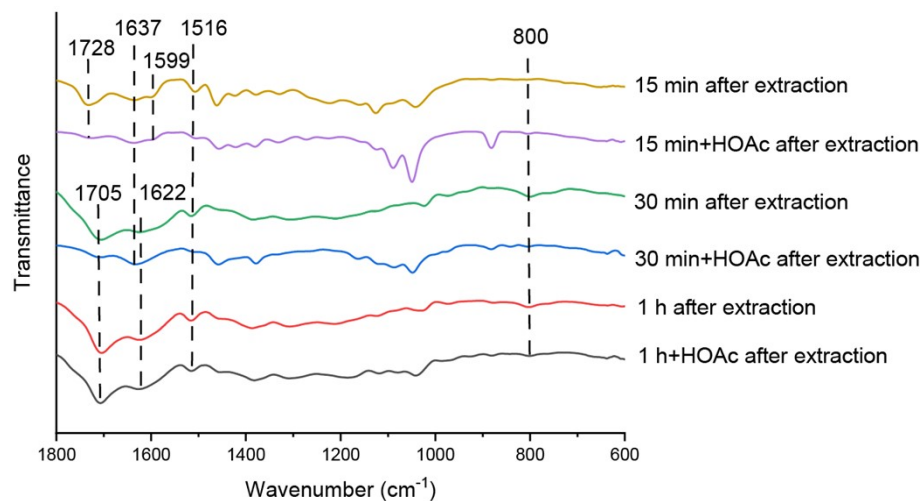

**Figure S3.** FT-IR spectra of residual solid of cellulose conversion after extraction by THF/PE, with addition of HOAc.

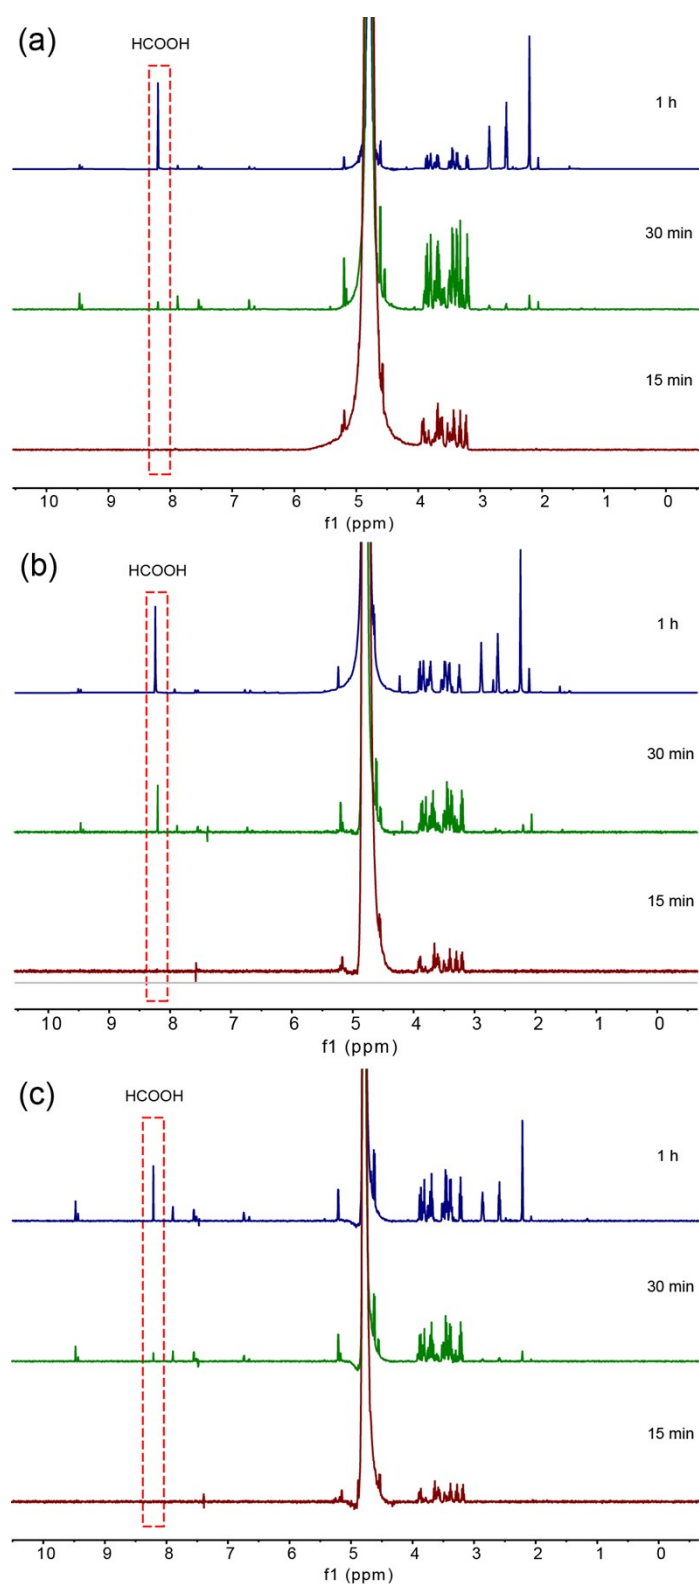

**Figure S4.**  $^1\text{H}$  NMR spectra of the reaction mixture of cellulose at  $170^\circ\text{C}$  (a) blank control, (b) in the presence of  $\text{O}_2$  and (c) in the presence of  $\text{N}_2$ .
